# Supplementary material for: Highly efficient hydrogenation reduction of aromatic nitro compounds using MOF derivative Co–N/C catalyst
Source: Royal Society of Chemistry journal article supplement (doi:10.1039/d1nj04139h), 2021-01-01
Supplement: d1nj04139h1.pdf [file d1nj04139h1.pdf]

Electronic Supplementary Information

**Highly Efficient Hydrogenation Reduction of Aromatic Nitro**

**Compounds using MOF Derivative Co-N/C Catalyst**

Yuyu Dai, Xiaoqing Li\*, Likai Wang, Xiangsheng Xu\*

College of Chemical Engineering, Zhejiang University of Technology, Hangzhou,

310014, P. R. China. Email: xqli@zjut.edu.cn; future@zjut.edu.cn

Content

**Table S1**

**Table S2**

**Figure S1-S3**

**Characterization of the corresponding aromatic amines products for the aromatic nitro compounds in Table 4**

**Table S1. The preparation method for the reported catalyst and the reaction condition for the hydrogenation reduction of nitrobenzoamide derivatives**

| Examples for the similar Co@C catalysts                                                           | Preparation method for the catalyst                                                                                                                                                                                                                                                                                       | The reaction time and H <sub>2</sub> pressure for the hydrogenation reduction of nitrobenzoamide derivatives | Conversion |
|---------------------------------------------------------------------------------------------------|---------------------------------------------------------------------------------------------------------------------------------------------------------------------------------------------------------------------------------------------------------------------------------------------------------------------------|--------------------------------------------------------------------------------------------------------------|------------|
| Co <sup>0</sup> -Co <sub>3</sub> O <sub>4</sub> /N-Doped Carbon Nanotubes Hybrids <sup>[22]</sup> | A solid mixture of GAH, melamine, and Co(NO <sub>3</sub> ) <sub>2</sub> ·6H <sub>2</sub> O was grinded into powder; Then, the powder was subjected to pyrolysis.                                                                                                                                                          | 3-15 h, 3 MPa H <sub>2</sub>                                                                                 | 99%        |
| Co catalyst <sup>[23]</sup>                                                                       | The mixture of polysilazane HTT, bisamidinatocobalt(II) complex and dicumylperoxid was crossed linked at 110 °C for 24 h; Then, the solid powder was subjected to pyrolysis.                                                                                                                                              | 15 h, 5 MPa H <sub>2</sub>                                                                                   | 82-99%     |
| Co-Co <sub>3</sub> O <sub>4</sub> /NGr@C-catalyst <sup>[24]</sup>                                 | A mixture of Co(OAc) <sub>2</sub> ·4H <sub>2</sub> O and Phen was stirred at 60 °C for 2 h. Next, Vulcan® XC 72R carbon was added and the suspension was stirred for 18 h. Then, the solid power was subjected to pyrolysis.                                                                                              | 13-20 h, 2 MPa H <sub>2</sub>                                                                                | 85-99%     |
| Co-Co <sub>3</sub> O <sub>4</sub> @carbon-700 catalyst <sup>[25]</sup>                            | A mixture of cobalt (II) acetate tetrahydrate and chitosan was refluxed at 70 °C for 20 h. Then, the solid power was subjected to pyrolysis.                                                                                                                                                                              | 6 h, 4 MPa H <sub>2</sub>                                                                                    | 99%        |
| Co@C NPs <sup>[21]</sup>                                                                          | The purple solution of Co(NO <sub>3</sub> ) <sub>2</sub> , Na <sub>2</sub> EDTA, and NaOH in H <sub>2</sub> O was transferred into stainless steel autoclave, followed by hydrothermal processing at 200 °C for 24 h. Then Co@C NPs was prepared by reduction of Co-EDTA in H <sub>2</sub> (50 mL/min) at 450 °C for 2 h. | 6-15 h, 1 MPa H <sub>2</sub>                                                                                 | 93-99%     |
| Co@NC catalyst <sup>[26]</sup>                                                                    | The carbon nitride g-C <sub>3</sub> N <sub>4</sub> was prepared by heating the melamine at 550 °C for 8 h; The cobalt nitrate hexahydrate, triethylene diamine and g-C <sub>3</sub> N <sub>4</sub> were mixture in deionized water; Then, the solid power was subjected to pyrolysis.                                     | 3 h, 1 MPa H <sub>2</sub>                                                                                    | 97%-99%    |
| Our prepared Co-N/C-800 catalysts                                                                 | ZIF-67 powder was prepared by the reaction of Co(NO <sub>3</sub> ) <sub>2</sub> ·6H <sub>2</sub> O and methylimizale in deionized water for 8 h at normal temperature. Then, the solid power was subjected to                                                                                                             | 4-8 h, 1.5 MPa H <sub>2</sub>                                                                                | 97-99%     |

|  |            |  |  |
|--|------------|--|--|
|  | pyrolysis. |  |  |
|--|------------|--|--|

**Table S2. Elemental analysis of Co-N/C-800 reused of 10 runs.**

| entry  | Co <sup>a</sup> (wt%) | C <sup>b</sup> (wt%) | H <sup>b</sup> (wt%) | N <sup>b</sup> (wt%) |
|--------|-----------------------|----------------------|----------------------|----------------------|
| Fresh  | 23.9                  | 56.9                 | 1.1                  | 3.1                  |
| Reused | 20.4                  | 58.8                 | 1.0                  | 2.7                  |

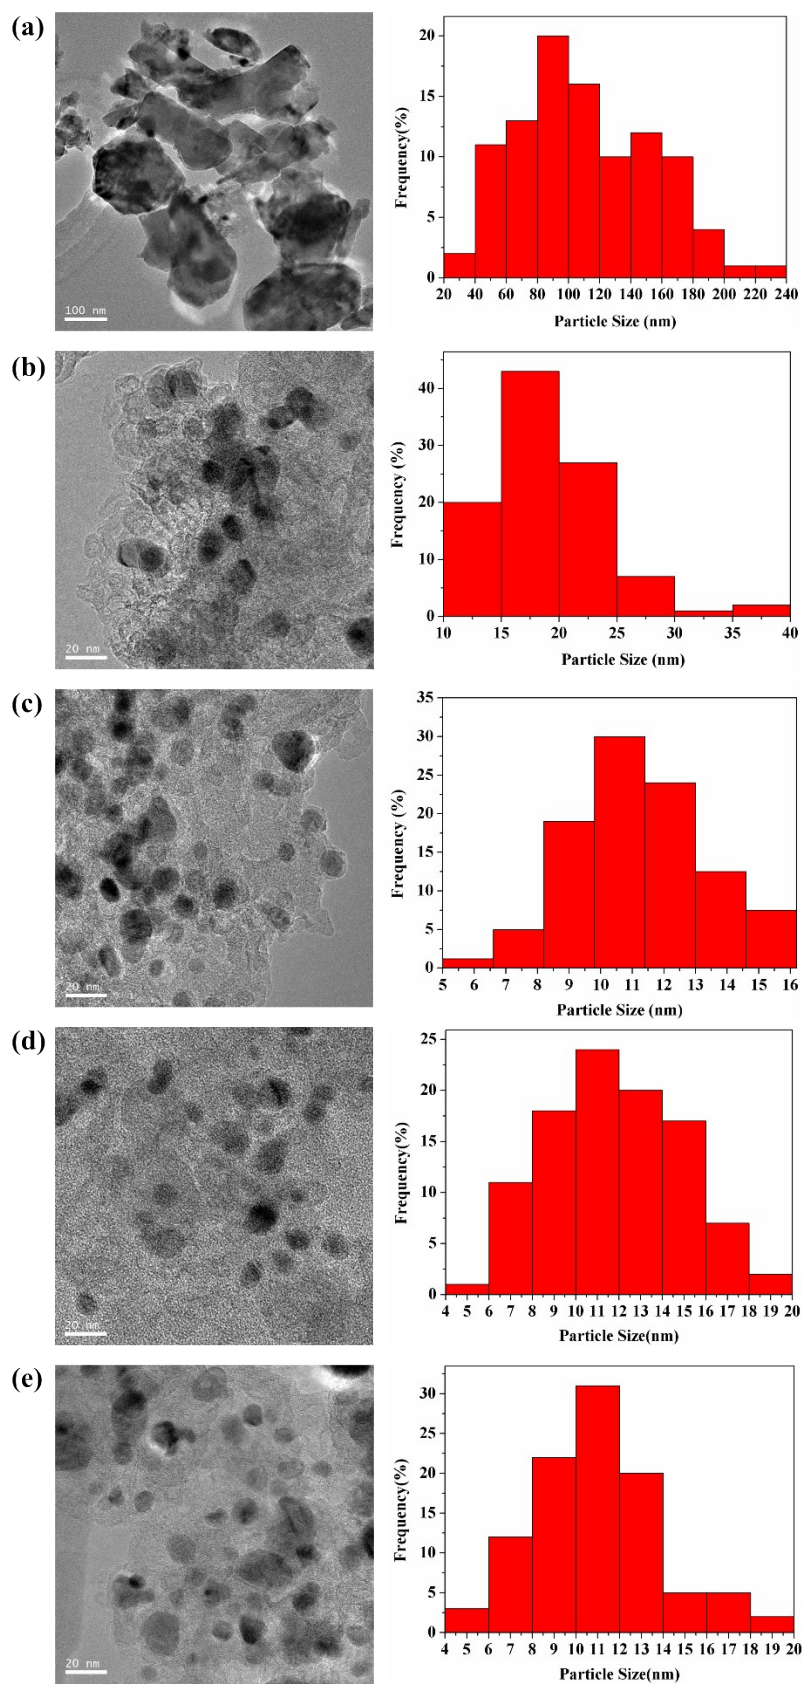

**Figure S1.** HR-TEM images (Left) and Particle size distribution statistics (right) of the as-prepared (a) Co-N/C-800-1, (b) Co-N/C-800-2, (c) Co-N/C-800, (d) Co-N/C-800-10, (e) Co-N/C-800-45.

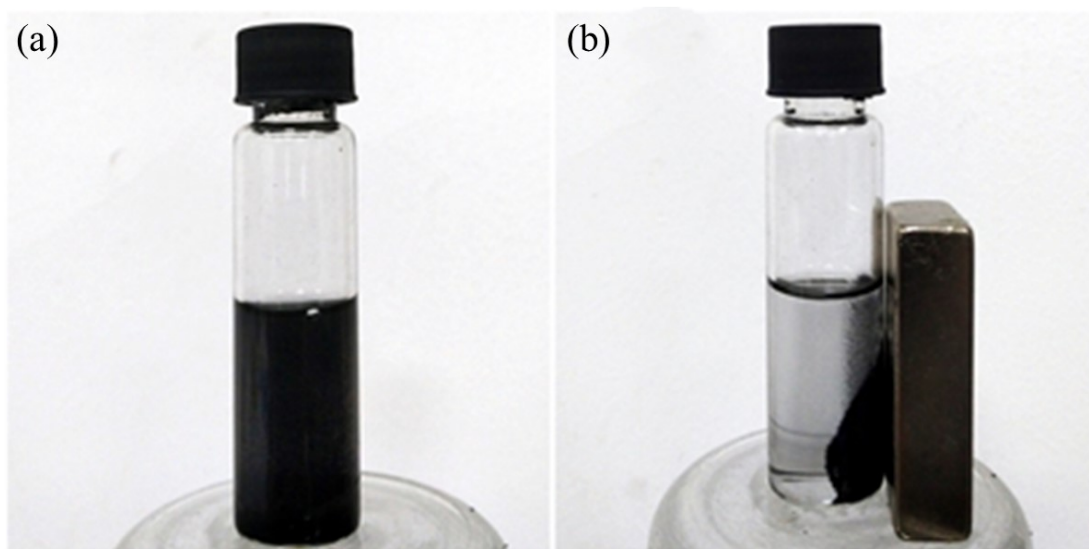

**Figure S2.** Collection of Co-N/C-800 catalyst

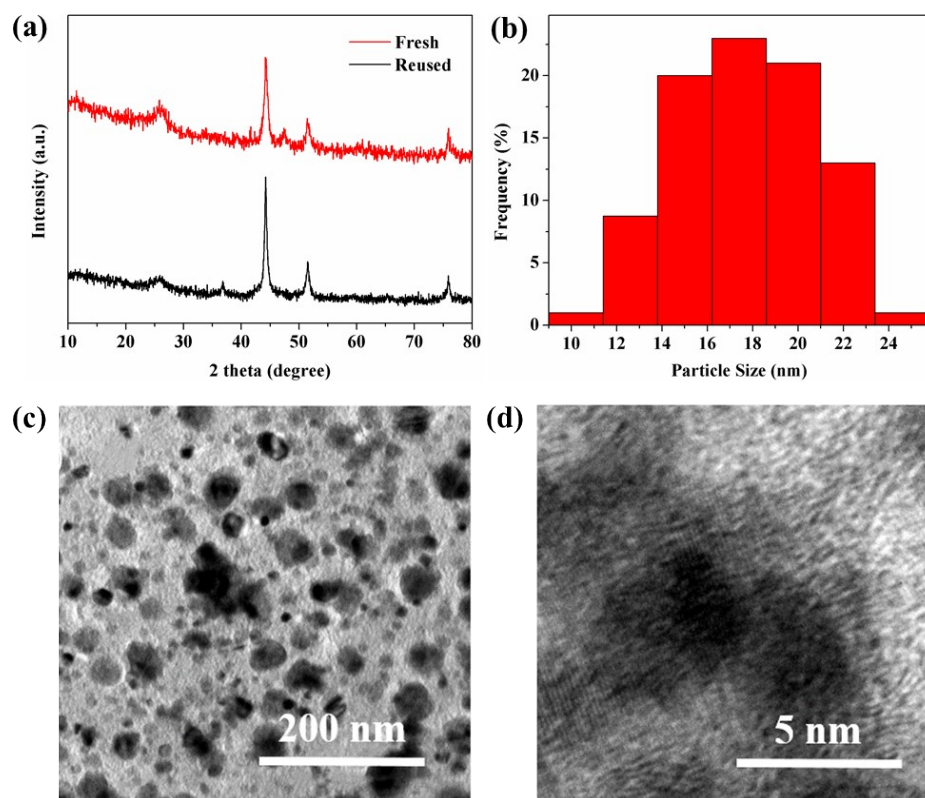

**Figure S3** (a) XRD spectra of the reused Co-N/C-800 catalyst; (b) Particle size distribution statistics of deactivation Co-N/C-800 catalyst; TEM images of partial deactivation Co-N/C-800 catalyst (c) at 200 nm, (d) at 5 nm.

**Characterization of the corresponding aromatic amines products for the aromatic nitro compounds in Table 4.**

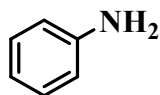

**E1**

**Aniline**

$^1\text{H}$  NMR (500 MHz, DMSO- $d_6$ )  $\delta$  7.07 – 6.97 (m, 2H), 6.61 – 6.54 (m, 2H), 6.54 – 6.47 (m, 1H), 4.99 (s, 2H).

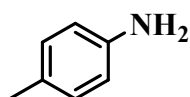

**E2**

**p-Toluidine**

$^1\text{H}$  NMR (500 MHz, DMSO- $d_6$ )  $\delta$  6.82 (d,  $J$  = 8.0 Hz, 2H), 6.49 – 6.44 (m, 2H), 4.77 (s, 2H), 2.12 (s, 3H).

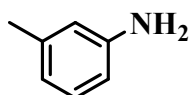

**E3**

**m-Toluidine**

$^1\text{H}$  NMR (500 MHz, DMSO- $d_6$ )  $\delta$  6.90 (t,  $J$  = 7.6 Hz, 1H), 6.42 – 6.35 (m, 2H), 6.33 (d,  $J$  = 7.3 Hz, 1H), 4.91 (s, 2H), 2.16 (s, 3H).

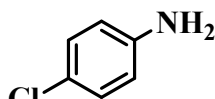

**E4**

**4-Chloroaniline**

$^1\text{H}$  NMR (500 MHz, DMSO)  $\delta$  7.05 – 6.98 (m, 2H), 6.60 – 6.52 (m, 2H), 5.22 (s, 2H).

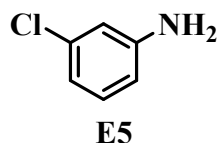

**m-Chloroaniline**

$^1\text{H}$  NMR (500 MHz, DMSO- $d_6$ )  $\delta$  7.00 (dd,  $J$  = 10.4, 5.6 Hz, 1H), 6.58 (t,  $J$  = 1.5 Hz, 1H), 6.52 – 6.46 (m, 2H), 5.38 (s, 2H).

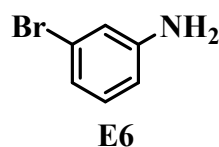

**3-Bromoaniline**

$^1\text{H}$  NMR (500 MHz, DMSO- $d_6$ )  $\delta$  6.94 (t,  $J$  = 8.0 Hz, 1H), 6.74 (t,  $J$  = 1.8 Hz, 1H), 6.64 – 6.59 (m, 1H), 6.54 (dd,  $J$  = 8.1, 1.9 Hz, 1H), 5.37 (s, 2H).

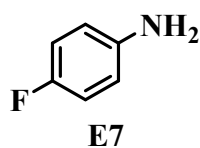

**4-Fluoroaniline**

$^1\text{H}$  NMR (500 MHz, DMSO- $d_6$ )  $\delta$  6.88 – 6.80 (m, 2H), 6.59 – 6.52 (m, 2H), 4.92 (s, 2H).

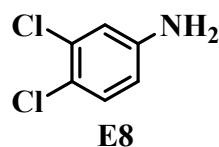

**3,4-Dichloroaniline**

$^1\text{H}$  NMR (500 MHz, DMSO- $d_6$ )  $\delta$  7.18 (dd,  $J$  = 8.7, 4.6 Hz, 1H), 6.77 – 6.71 (m, 1H), 6.56 – 6.48 (m, 1H), 5.54 (s, 2H).

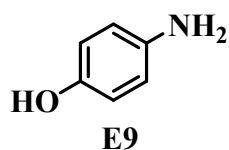

### **p-Aminophenol**

$^1\text{H}$  NMR (500 MHz, DMSO- $d_6$ )  $\delta$  8.33 (s, 1H), 6.49 – 6.45 (m, 2H), 6.43 – 6.38 (m, 2H), 4.37 (s, 2H).

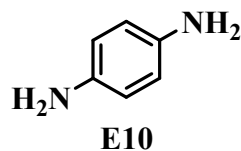

### **p-Phenylenediamine**

$^1\text{H}$  NMR (500 MHz, DMSO- $d_6$ )  $\delta$  6.36 (s, 4H), 4.18 (s, 4H).

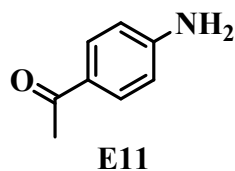

### **4'-Aminoacetophenone**

$^1\text{H}$  NMR (500 MHz, DMSO- $d_6$ )  $\delta$  7.70 – 7.64 (m, 2H), 6.61 – 6.50 (m, 2H), 6.03 (s, 2H), 2.38 (s, 3H).

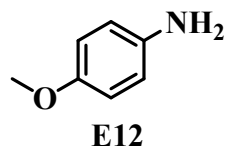

### **p-Anisidine**

$^1\text{H}$  NMR (500 MHz, DMSO- $d_6$ )  $\delta$  6.69 – 6.61 (m, 2H), 6.56 – 6.48 (m, 2H), 4.58 (s, 2H), 3.62 (s, 3H).

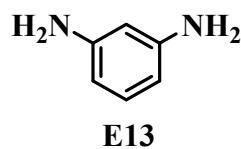

### **m-Phenylenediamine**

$^1\text{H}$  NMR (500 MHz, DMSO- $d_6$ )  $\delta$  6.65 (t,  $J = 7.8$  Hz, 1H), 5.81 (t,  $J = 2.0$  Hz, 1H), 5.79 (d,  $J = 2.1$  Hz, 1H), 5.77 (d,  $J = 2.1$  Hz, 1H), 4.64 (s, 4H).

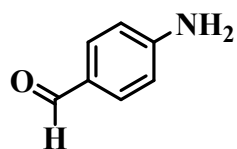

**E14**

**4-Aminobenzaldehyde**

$^1\text{H}$  NMR (500 MHz, DMSO- $d_6$ )  $\delta$  9.57 (s, 1H), 7.60 – 7.46 (m, 2H), 6.72 – 6.54 (m, 2H), 6.29 (s, 2H).

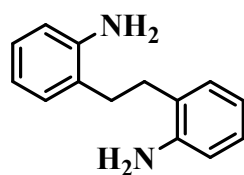

**E15**

**2, 2'-Ethylenedianiline**

$^1\text{H}$  NMR (500 MHz, DMSO- $d_6$ )  $\delta$  6.99 (d,  $J$  = 7.2 Hz, 2H), 6.89 (t,  $J$  = 7.3 Hz, 2H), 6.63 (d,  $J$  = 7.7 Hz, 2H), 6.50 (t,  $J$  = 7.1 Hz, 2H), 4.86 (s,  $J$  = 35.8 Hz, 4H), 2.67 (d,  $J$  = 14.7 Hz, 4H).
